# Supplementary material for: Time Trend in SARS-CoV-2 Seropositivity, Surveillance Detection- and Infection Fatality Ratio until Spring 2021 in the Tirschenreuth County—Results from a Population-Based Longitudinal Study in Germany
Source: MDPI journal article supplement (doi:10.3390/v14061168), 2022-05-27
Supplement: s1 [file s1]

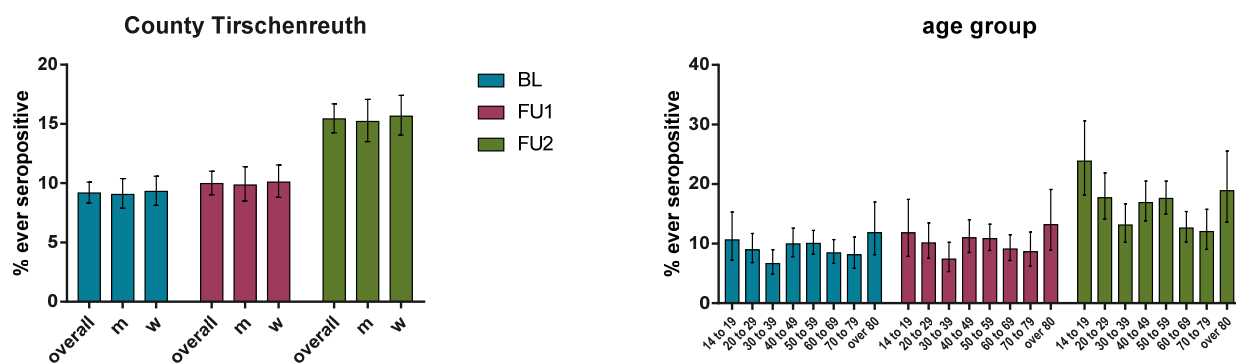

**Supplementary Figure S1** Standardized ever seropositives (N-based) overall and by age groups until Baseline (BL), Follow up 1 (FU1) and Follow up 2 (FU2)
