# Supplementary material for: Time Trend in SARS-CoV-2 Seropositivity, Surveillance Detection- and Infection Fatality Ratio until Spring 2021 in the Tirschenreuth County—Results from a Population-Based Longitudinal Study in Germany
Source: MDPI journal article supplement (doi:10.3390/v14061168), 2022-05-27
Supplement: s1 [file s1]

**Supplemental Table S1 (Supplement to Table 1) Participant characteristics and dropout analysis.**

Shown are, as indicated, median and IQR or percentage and number of individuals for the given characteristic for analyzable participants and drop-outs at BL, FU1, and FU2. P-values test for difference in the characteristics between analyzable participants and drop-outs.

| Variable                                                  | BL                                  | FU1<br>participant                              | FU1<br>dropout                                | FU1<br>p-value | FU2<br>participant                              | FU2<br>dropout                                | FU2<br>p-value |
|-----------------------------------------------------------|-------------------------------------|-------------------------------------------------|-----------------------------------------------|----------------|-------------------------------------------------|-----------------------------------------------|----------------|
| <b>Age</b><br>median (min,<br>max, IQR)<br>[n=4181]       | 52.0<br>(14.0, 102.0,<br>35.0-64.0) | 53.0<br>(14.0, 102.0,<br>37.0-64.0)<br>[n=3513] | 42.0<br>(14.0, 93.0,<br>29.0-58.0)<br>[n=668] | <0.001         | 53.0<br>(14.0, 102.0,<br>37.0-64.0)<br>[n=3374] | 44.0<br>(14.0, 91.0,<br>30.0-59.0)<br>[n=807] | <0.001         |
| <b>Age 14-20</b><br>% (n)<br>[n=4181]                     | 5.4 (225)                           | 5.0 (176)<br>[n=3513]                           | 7.3 (49)<br>[n=668]                           | 0.019          | 5.2 (177)<br>[n=3374]                           | 5.9 (48)<br>[n=807]                           | 0.48           |
| <b>Age 20-49</b><br>% (n)<br>[n=4181]                     | 40.8 (1707)                         | 38.3 (1345)<br>[n=3513]                         | 54.2 (362)<br>[n=668]                         | <0.001         | 38.1 (1284)<br>[n=3374]                         | 52.4 (423)<br>[n=807]                         | <0.001         |
| <b>Age 50-69</b><br>% (n)<br>[n=4181]                     | 38.8 (1624)                         | 41.2 (1449)<br>[n=3513]                         | 26.2 (175)<br>[n=668]                         | <0.001         | 41.2 (1389)<br>[n=3374]                         | 29.1 (235)<br>[n=807]                         | <0.001         |
| <b>Age 70+</b><br>% (n)<br>[n=4181]                       | 14.9 (625)                          | 15.5 (543)<br>[n=3513]                          | 12.3 (82)<br>[n=668]                          | 0.04           | 15.5 (524)<br>[n=3374]                          | 12.5 (101)<br>[n=807]                         | 0.035          |
| <b>Female</b><br>% (n)<br>[n=4181]                        | 51.6 (2158)                         | 53.0 (1861)<br>[n=3513]                         | 44.5 (297)<br>[n=668]                         | <0.001         | 53.7 (1813)<br>[n=3374]                         | 42.8 (345)<br>[n=807]                         | <0.001         |
| <b>BMI</b><br>median (min,<br>max, IQR)<br>[n=4134]       | 26.6<br>(13.9, 62.1,<br>23.7-30.4)  | 26.6<br>(13.9, 62.1,<br>23.7-30.3)<br>[n=3474]  | 26.8<br>(16.0, 56.5,<br>23.9-30.4)<br>[n=660] | 0.396          | 26.6<br>(13.9, 62.1,<br>23.7-30.4)<br>[n=3339]  | 26.3<br>(16.0, 56.5,<br>23.7-30.1)<br>[n=795] | 0.556          |
| <b>Disease</b>                                            |                                     |                                                 |                                               |                |                                                 |                                               |                |
| <b>autoimmune</b><br>% (n)<br>[n=4081]                    | 7.1 (289)                           | 7.3 (250)<br>[n=3435]                           | 6.0 (39)<br>[n=646]                           | 0.296          | 7.4 (243)<br>[n=3300]                           | 5.9 (46)<br>[n=781]                           | 0.172          |
| <b>cancer</b><br>% (n)<br>[n=4081]                        | 4.9 (202)                           | 5.2 (178)<br>[n=3435]                           | 3.7 (24)<br>[n=646]                           | 0.139          | 5.0 (164)<br>[n=3300]                           | 4.9 (38)<br>[n=781]                           | 0.977          |
| <b>diabetes</b><br>% (n)<br>[n=4081]                      | 7.6 (312)                           | 7.5 (259)<br>[n=3435]                           | 8.2 (53)<br>[n=646]                           | 0.615          | 7.4 (245)<br>[n=3300]                           | 8.6 (67)<br>[n=781]                           | 0.309          |
| <b>cardiovascular</b><br>% (n)<br>[n=4081]                | 9.9 (402)                           | 9.6 (331)<br>[n=3435]                           | 11.0 (71)<br>[n=646]                          | 0.323          | 9.5 (314)<br>[n=3300]                           | 11.3 (88)<br>[n=781]                          | 0.158          |
| <b>none</b><br>% (n)<br>[n=4081]                          | 75.8 (3093)                         | 75.6 (2596)<br>[n=3435]                         | 76.9 (497)<br>[n=646]                         | 0.49           | 76.0 (2507)<br>[n=3300]                         | 75.0 (586)<br>[n=781]                         | 0.614          |
| <b>Education</b>                                          |                                     |                                                 |                                               |                |                                                 |                                               |                |
| <b>years</b><br>median (min,<br>max, IQR)<br>[n=4085]     | 11.0<br>(6.0, 22.0,<br>10.0-14.0)   | 11.0<br>(6.0, 22.0,<br>10.0-13.0)<br>[n=3433]   | 11.0<br>(6.0, 21.0,<br>10.0-14.0)<br>[n=652]  | 0.406          | 11.0<br>(6.0, 22.0,<br>10.0-14.0)<br>[n=3301]   | 11.0<br>(6.0, 21.0,<br>10.0-14.0)<br>[n=784]  | 0.365          |
| <b>high</b><br>% (n)<br>[n=4085]                          | 30.0 (1225)                         | 29.5 (1013)<br>[n=3433]                         | 32.5 (212)<br>[n=652]                         | 0.136          | 29.8 (985)<br>[n=3301]                          | 30.6 (240)<br>[n=784]                         | 0.703          |
| <b>antibody status</b>                                    |                                     |                                                 |                                               |                |                                                 |                                               |                |
| <b>N-antibody<br/>positive at BL</b><br>% (n)<br>[n=4181] | 8.9 (374)                           | 10.0 (351)<br>[n=3513]                          | 3.4 (23)<br>[n=668]                           | <0.001         | 10.3 (349)<br>[n=3374]                          | 3.1 (25)<br>[n=807]                           | <0.001         |

**Supplemental Table S2 (Supplement to Table 2). Crude seroprevalence among analyzed participants and changes over time.** The number of total and newly seropositive and newly seronegative participants for N or S protein specific antibodies at baseline (June 2020), at FU1 (November 2020), and at FU2 (April 2021) also shown is the percentage of the according participants group.

| Time of analysis       | Analyzable participants # | Participants# previously pos/neg | Newly N antibody positive % (#)1 | Newly N antibody negative % (#)1 | Seropositive as sum | Ever seropositive |
|------------------------|---------------------------|----------------------------------|----------------------------------|----------------------------------|---------------------|-------------------|
| participant age        |                           |                                  |                                  |                                  |                     |                   |
| <b>Baseline</b>        | <b>4181</b>               | <b>0/4181</b>                    | <b>8.95 (374)</b>                | <b>(n/a)</b>                     |                     |                   |
| 14 to 19               | 225                       | 0/225                            | 10.67 (24)                       | (n/a)                            |                     |                   |
| 20 to 29               | 523                       | 0/523                            | 8.99 (47)                        |                                  |                     |                   |
| 30 to 39               | 583                       | 0/583                            | 6.69 (39)                        |                                  |                     |                   |
| 40 to 49               | 601                       | 0/601                            | 9.98 (60)                        |                                  |                     |                   |
| 50 to 59               | 875                       | 0/875                            | 10.06 (88)                       |                                  |                     |                   |
| 60 to 69               | 749                       | 0/749                            | 8.41 (63)                        |                                  |                     |                   |
| 70 to 79               | 420                       | 0/420                            | 7.62 (32)                        |                                  |                     |                   |
| over 80                | 205                       | 0/205                            | 10.24 (21)                       |                                  |                     |                   |
| <b>FU1<sup>1</sup></b> | <b>3513</b>               | <b>351/3162</b>                  | <b>0.66 (21)</b>                 | <b>3.70 (13)</b>                 | <b>9.22</b>         | <b>9.55</b>       |
| 14 to 19               | 176                       | 24/152                           | 1.32 (2)                         | 4.17 (1)                         | 11.40               | 11.84             |
| 20 to 29               | 400                       | 42/358                           | 0.84 (3)                         | 2.38 (1)                         | 9.54                | 9.75              |
| 30 to 39               | 447                       | 37/410                           | 0.00 (0)                         | 8.11 (3)                         | 6.15                | 6.69              |
| 40 to 49               | 498                       | 56/442                           | 1.13 (5)                         | 5.36 (3)                         | 10.47               | 11                |
| 50 to 59               | 766                       | 81/685                           | 0.73 (5)                         | 1.23 (1)                         | 10.59               | 10.71             |
| 60 to 69               | 683                       | 61/622                           | 0.32 (2)                         | 3.28 (2)                         | 8.43                | 8.71              |
| 70 to 79               | 373                       | 32/341                           | 0.59 (2)                         | 6.25 (2)                         | 7.68                | 8.16              |
| over 80                | 170                       | 18/152                           | 1.32 (2)                         | 0.00 (0)                         | 11.42               | 11.42             |
| <b>FU2<sup>2</sup></b> | <b>3177</b>               | <b>349/2828</b>                  | <b>5.80 (164)</b>                | <b>4.30 (15)</b>                 | <b>14.09</b>        | <b>14.80</b>      |
| 14 to 19               | 164                       | 24/140                           | 13.57 (19)                       | 4.17 (1)                         | 22.95               | 23.81             |
| 20 to 29               | 340                       | 41/299                           | 8.36 (25)                        | 4.88 (2)                         | 16.63               | 17.30             |
| 30 to 39               | 390                       | 32/358                           | 6.15 (22)                        | 12.5 (4)                         | 11.15               | 12.42             |
| 40 to 49               | 454                       | 57/397                           | 5.79 (23)                        | 8.77 (5)                         | 14.74               | 16.16             |
| 50 to 59               | 700                       | 83/617                           | 7.46 (46)                        | 2.41 (2)                         | 17.00               | 17.37             |
| 60 to 69               | 629                       | 60/569                           | 3.51 (20)                        | 1.67 (1)                         | 11.51               | 11.91             |
| 70 to 79               | 348                       | 32/316                           | 2.53 (8)                         | 0.00 (0)                         | 10.02               | 10.49             |
| over 80                | 142                       | 20/132                           | 0.76 (1)                         | 0.00 (0)                         | 12.1                | 12.1              |

**Suppl Table S3 (supplement to figure 2). Standardized (N-based) seroprevalence, surveillance detection ratio (SDR), and infection fatality ratios (IFR) overall and by age groups for Baseline (BL), Follow up 1 (BL to FU1) and Follow up 2 (FU1 to FU2).** Shown are the population at risk in the general Tirschenreuth population and the analyzed cohort as numbers and percentage of the overall group. Further shown are standardized and corrected seroprevalence (based on N-antibodies) (%), the surveillance detection ratio (SDR) and infection fatality ratio (%) in the overall county population, the indicated sexes and the indicated age groups. Further given are the 95% Wilson confidence intervals (95%-CI) or 95% Bayesian credibility intervals, respectively. The CI is marked as [reg.] for seroprevalence and SDR, when case prevalence based on registered infections exceeded standardized seroprevalence. In those cases SDR was set to 1.0 and registered case numbers were used for further calculations.

| Sub group          | Population at risk Tirschenreuth #; [%] |                |                | Population at risk Cohort #; [%] |               |               | standardized new seropositive %; [95%-CI] |                     |                       | SDR ratio; [95% CI]   |                     |                     | IFR %; [95%-CI]       |                       |                        |
|--------------------|-----------------------------------------|----------------|----------------|----------------------------------|---------------|---------------|-------------------------------------------|---------------------|-----------------------|-----------------------|---------------------|---------------------|-----------------------|-----------------------|------------------------|
|                    | BL                                      | FU1            | FU2            | BL                               | FU1           | FU2           | BL                                        | FU1                 | FU2                   | BL                    | FU1                 | FU2                 | BL                    | FU1                   | FU2                    |
| <b>Overall</b>     | 64643; [100]                            | 58709; [100]   | 58288; [100]   | 4181; [100]                      | 3162; [100]   | 2828; [100]   | 9.18; [8.34 - 10.09]                      | 0.87; [reg.]        | 6.06; [5.24 - 7.00]   | 5.35; [4.78 - 5.99]   | 1.00; [reg.]        | 1.14; [1.00 - 1.32] | 2.32; [1.92 - 2.82]   | 1.95; [0.96 - 3.97]   | 3.28; [2.60 - 4.14]    |
| <b>m</b>           | 32239; [49.87]                          | 29318; [49.94] | 29105; [49.93] | 2023; [48.39]                    | 1488; [47.06] | 1304; [46.11] | 9.06; [7.89 - 10.39]                      | 0.88; [reg.]        | 5.94; [4.78 - 7.35]   | 6.29; [5.32 - 7.41]   | 1.00; [reg.]        | 1.17; [1.00 - 1.46] | 2.64; [2.04 - 3.43]   | 1.95; [0.72 - 5.31]   | 3.18; [2.27 - 4.47]    |
| <b>w</b>           | 32404; [50.13]                          | 29392; [50.06] | 29183; [50.07] | 2158; [51.61]                    | 1674; [52.94] | 1524; [53.89] | 9.30; [8.14 - 10.59]                      | 0.87; [reg.]        | 6.19; [5.09 - 7.51]   | 4.68; [4.02 - 5.44]   | 1.00; [reg.]        | 1.11; [1.00 - 1.36] | 2.02; [1.53 - 2.68]   | 1.95; [0.74 - 5.26]   | 3.38; [2.46 - 4.65]    |
| <b>age group</b>   |                                         |                |                |                                  |               |               |                                           |                     |                       |                       |                     |                     |                       |                       |                        |
| <b>14 to 19</b>    | 3994; [6.18]                            | 3570; [6.08]   | 3522; [6.04]   | 225; [5.38]                      | 152; [4.81]   | 140; [4.95]   | 10.62; [7.24 - 15.33]                     | 1.33; [0.37 - 4.69] | 13.64; [8.92 - 20.30] | 11.51; [6.97 - 18.75] | 1.44; [1.00 - 5.31] | 2.48; [1.59 - 3.77] | 0.00; [0.00 - 0.90]   | 0.00; [0.00 - 10.36]  | 0.00; [0.00 - 0.80]    |
| <b>20 to 29</b>    | 8146; [12.60]                           | 7416; [12.63]  | 7354; [12.62]  | 523; [12.51]                     | 358; [11.32]  | 299; [10.57]  | 8.96; [6.80 - 11.72]                      | 1.28; [reg.]        | 8.39; [5.76 - 12.09]  | 7.39; [5.27 - 10.30]  | 1.00; [reg.]        | 1.44; [1.00 - 2.10] | 0.14; [0.03 - 0.78]   | 0.00; [0.00 - 4.49]   | 0.00; [0.00 - 0.62]    |
| <b>30 to 39</b>    | 8430; [13.04]                           | 7869; [13.40]  | 7869; [13.50]  | 583; [13.94]                     | 410; [12.97]  | 358; [12.66]  | 6.65; [4.90 - 8.98]                       | 0.80; [reg.]        | 6.16; [4.11 - 9.15]   | 5.58; [3.90 - 7.97]   | 1.00; [reg.]        | 1.14; [1.00 - 1.70] | 0.00; [0.00 - 0.67]   | 0.00; [0.00 - 7.17]   | 0.00; [0.00 - 0.79]    |
| <b>40 to 49</b>    | 8782; [13.59]                           | 7909; [13.47]  | 7819; [13.41]  | 601; [14.37]                     | 442; [13.98]  | 397; [14.04]  | 9.94; [7.80 - 12.59]                      | 1.14; [0.49 - 2.63] | 6.65; [reg.]          | 5.62; [4.21 - 7.45]   | 1.29; [1.00 - 3.06] | 1.00; [reg.]        | 0.00; [0.00 - 0.43]   | 0.00; [0.00 - 4.71]   | 0.19; [0.04 - 1.12]    |
| <b>50 to 59</b>    | 12813; [19.82]                          | 11524; [19.63] | 11440; [19.63] | 875; [20.93]                     | 685; [21.66]  | 617; [21.82]  | 10.06; [8.24 - 12.23]                     | 0.89; [reg.]        | 7.53; [5.70 - 9.88]   | 6.02; [4.74 - 7.61]   | 1.00; [reg.]        | 1.36; [1.02 - 1.80] | 0.47; [0.21 - 1.04]   | 0.00; [0.00 - 4.08]   | 0.58; [0.25 - 1.42]    |
| <b>60 to 69</b>    | 10412; [16.11]                          | 9531; [16.23]  | 9501; [16.3]   | 749; [17.91]                     | 622; [19.67]  | 569; [20.12]  | 8.46; [6.67 - 10.67]                      | 0.69; [reg.]        | 3.86; [reg.]          | 6.30; [4.73 - 8.39]   | 1.00; [reg.]        | 1.00; [reg.]        | 1.03; [0.53 - 2.04]   | 1.52; [0.28 - 10.61]  | 3.54; [1.81 - 6.95]    |
| <b>70 to 79</b>    | 6772; [10.48]                           | 6224; [10.60]  | 6186; [10.61]  | 420; [10.05]                     | 341; [10.78]  | 316; [11.17]  | 8.10; [5.85 - 11.10]                      | 0.60; [0.17 - 2.13] | 3.67; [reg.]          | 3.78; [2.62 - 5.39]   | 1.28; [1.00 - 4.79] | 1.00; [reg.]        | 6.38; [4.04 - 10.16]  | 2.69; [0.40 - 22.63]  | 10.57; [5.37 - 20.96]  |
| <b>at least 80</b> | 5294; [8.19]                            | 4667; [7.95]   | 4597; [7.89]   | 205; [4.90]                      | 152; [4.81]   | 132; [4.67]   | 11.84; [8.11 - 16.99]                     | 1.50; [0.44 - 4.95] | 6.57; [reg.]          | 2.84; [1.90 - 4.20]   | 1.27; [1.00 - 4.29] | 1.00; [reg.]        | 14.04; [9.23 - 21.63] | 11.43; [2.90 - 42.39] | 24.17; [12.55 - 47.61] |

**Suppl Table S4 (supplement to figure 2, part 2).**

**Numbers of registered SARS-CoV-2 infections and related death case in the county Tirschenreuths.** Given are the general population of Tirschenreuth as of the census 2019 (14 years and older) as well as registered deaths and SARS-CoV-2 infections for BL, the period between BL and FU1 (FU1) and the period between FU1 and FU2 (FU2). Numbers are shown for the overall county population as well as the indicated age groups, sexes and municipalities.

|                          | Tirschenreuth | Registered deaths # |     |     | Registered infections # |     |      |
|--------------------------|---------------|---------------------|-----|-----|-------------------------|-----|------|
|                          | population #  | BL                  | FU1 | FU2 | BL                      | FU1 | FU2  |
| <b>overall</b>           | 64643         | 138                 | 10  | 116 | 1109                    | 513 | 3100 |
| <b>age group</b>         |               |                     |     |     |                         |     |      |
| 14 to 19                 | 3994          | 0                   | 0   | 0   | 37                      | 33  | 194  |
| 20 to 29                 | 8146          | 1                   | 0   | 0   | 99                      | 95  | 428  |
| 30 to 39                 | 8430          | 0                   | 0   | 0   | 101                     | 63  | 427  |
| 40 to 49                 | 8782          | 0                   | 0   | 1   | 156                     | 70  | 520  |
| 50 to 59                 | 12813         | 6                   | 0   | 5   | 214                     | 102 | 635  |
| 60 to 69                 | 10412         | 9                   | 1   | 13  | 139                     | 66  | 367  |
| 70 to 79                 | 6772          | 35                  | 1   | 24  | 145                     | 29  | 227  |
| over 80                  | 5294          | 87                  | 8   | 73  | 218                     | 55  | 302  |
| <b>sex</b>               |               |                     |     |     |                         |     |      |
| m                        | 32239         | 77                  | 5   | 55  | 464                     | 257 | 1473 |
| w                        | 32404         | 61                  | 5   | 61  | 645                     | 256 | 1627 |
| <b>municipality</b>      |               |                     |     |     |                         |     |      |
| Bad Neualbenreuth        | 1186          | 0                   | 0   | 5   | 10                      | 4   | 55   |
| Brand                    | 1025          | 0                   | 0   | 1   | 5                       | 2   | 65   |
| Bärnau                   | 2795          | 2                   | 0   | 4   | 45                      | 33  | 117  |
| Ebnath                   | 1710          | 0                   | 0   | 0   | 3                       | 7   | 52   |
| Erbendorf                | 4476          | 21                  | 0   | 6   | 93                      | 22  | 187  |
| Falkenberg               | 822           | 0                   | 0   | 2   | 11                      | 3   | 38   |
| Friedenfels              | 1103          | 1                   | 1   | 1   | 19                      | 2   | 53   |
| Fuchsmühl                | 1387          | 8                   | 0   | 0   | 54                      | 5   | 59   |
| Immenreuth               | 1600          | 0                   | 0   | 2   | 1                       | 17  | 132  |
| Kastl                    | 1208          | 1                   | 0   | 0   | 5                       | 10  | 50   |
| Kemnath                  | 4773          | 7                   | 0   | 4   | 30                      | 11  | 307  |
| Konnersreuth             | 1501          | 9                   | 0   | 3   | 60                      | 14  | 58   |
| Krummennaab              | 1299          | 2                   | 0   | 0   | 34                      | 8   | 36   |
| Kulmain                  | 1928          | 0                   | 0   | 2   | 4                       | 19  | 93   |
| Leonberg                 | 870           | 2                   | 0   | 2   | 12                      | 6   | 37   |
| Mitterteich              | 5899          | 21                  | 0   | 17  | 172                     | 60  | 191  |
| Mähring                  | 1560          | 4                   | 0   | 4   | 31                      | 17  | 64   |
| Neusorg                  | 1810          | 2                   | 1   | 4   | 17                      | 16  | 77   |
| Pechbrunn                | 1173          | 0                   | 0   | 1   | 20                      | 8   | 30   |
| Plößberg                 | 2835          | 15                  | 0   | 1   | 85                      | 21  | 151  |
| Pullenreuth              | 1500          | 1                   | 0   | 2   | 7                       | 7   | 78   |
| Reuth b.Erbendorf        | 994           | 0                   | 1   | 2   | 16                      | 12  | 50   |
| Tirschenreuth            | 7807          | 15                  | 5   | 30  | 145                     | 80  | 516  |
| Waldershof               | 3869          | 12                  | 2   | 5   | 51                      | 42  | 176  |
| Waldsassen               | 5862          | 8                   | 0   | 9   | 103                     | 65  | 293  |
| Wiesau                   | 3651          | 7                   | 0   | 9   | 75                      | 22  | 135  |
| <b>Senior care homes</b> |               |                     |     |     |                         |     |      |
| without senior care home | 20773         | 13                  | 2   | 28  | 223                     | 155 | 950  |
| with senior care home    | 43870         | 125                 | 8   | 88  | 885                     | 358 | 2150 |

# Supplemental Table S5 (Supplement to Supplemental Figure 2)

Standardized % “ever seropositives” for the indicated intervals and subgroups

|                          | standardized ever seropositive %; [CI] |                      |                      |
|--------------------------|----------------------------------------|----------------------|----------------------|
|                          | until BL                               | until FU1            | until FU2            |
| <b>Overall</b>           | 9.18; [8.34-10.09]                     | 9.97; [9.03-11.01]   | 15.43; [14.25-16.69] |
| <b>m</b>                 | 9.06; [7.89-10.39]                     | 9.86; [8.51-11.39]   | 15.21; [13.51-17.08] |
| <b>w</b>                 | 9.30; [8.14-10.59]                     | 10.09; [8.80-11.54]  | 15.65; [14.05-17.40] |
| <b>Age group</b>         |                                        |                      |                      |
| 14 to 19                 | 10.62; [7.24-15.33]                    | 11.81; [7.84-17.41]  | 23.84; [18.16-30.63] |
| 20 to 29                 | 8.96; [6.80-11.72]                     | 10.13; [7.54-13.47]  | 17.67; [14.14-21.86] |
| 30 to 39                 | 6.65; [4.90-8.98]                      | 7.40; [5.32-10.21]   | 13.11; [10.22-16.67] |
| 40 to 49                 | 9.94; [7.80-12.59]                     | 10.97; [8.52-14.02]  | 16.89; [13.83-20.47] |
| 50 to 59                 | 10.06; [8.24-12.23]                    | 10.86; [8.85-13.26]  | 17.57; [14.99-20.48] |
| 60 to 69                 | 8.46; [6.67-10.67]                     | 9.09; [7.16-11.48]   | 12.60; [10.27-15.37] |
| 70 to 79                 | 8.10; [5.85-11.10]                     | 8.65; [6.20-11.94]   | 12.00; [9.04-15.76]  |
| at least 80              | 11.84; [8.11-16.99]                    | 13.17; [8.89-19.07]  | 18.87; [13.62-25.55] |
| <b>Municipality</b>      |                                        |                      |                      |
| Bad Neualbenreuth        | 7.65; [3.77-14.88]                     | 7.98; [3.73-16.29]   | 14.07; [8.09-23.34]  |
| Brand                    | 5.16; [1.78-14.02]                     | 5.35; [1.73-15.34]   | 14.00; [6.95-26.19]  |
| Bärnau                   | 9.51; [6.06-14.63]                     | 12.25; [8.02-18.28]  | 16.44; [11.35-23.22] |
| Ebnath                   | 6.25; [2.47-14.91]                     | 8.20; [3.38-18.58]   | 11.24; [5.24-22.48]  |
| Erbendorf                | 8.22; [5.47-12.19]                     | 8.72; [5.63-13.26]   | 13.08; [9.12-18.41]  |
| Falkenberg               | 2.73; [0.76-9.37]                      | 4.40; [1.46-12.50]   | 11.71; [5.83-22.12]  |
| Friedenfels              | 5.99; [2.62-13.13]                     | 6.17; [2.52-14.32]   | 10.97; [5.56-20.50]  |
| Fuchsmühl                | 14.61; [8.69-23.52]                    | 14.97; [8.52-24.96]  | 19.85; [12.01-31.01] |
| Immenreuth               | 1.00; [0.18-5.45]                      | 2.06; [0.52-7.85]    | 10.22; [5.27-18.91]  |
| Kastl                    | 2.52; [0.71-8.52]                      | 3.34; [1.02-10.39]   | 8.17; [3.69-17.12]   |
| Kemnath                  | 1.88; [0.83-4.17]                      | 2.11; [0.93-4.71]    | 10.90; [7.49-15.60]  |
| Konnernsreuth            | 12.73; [7.72-20.28]                    | 13.66; [8.28-21.70]  | 18.24; [11.71-27.29] |
| Krummennaab              | 12.26; [6.86-20.96]                    | 13.76; [7.60-23.64]  | 16.77; [9.69-27.46]  |
| Kulmain                  | 5.22; [2.57-10.34]                     | 6.21; [2.94-12.62]   | 10.98; [6.24-18.61]  |
| Leonberg                 | 20.88; [12.95-31.87]                   | 21.57; [12.99-33.62] | 34.07; [22.96-47.27] |
| Mitterteich              | 19.03; [15.38-23.30]                   | 20.05; [16.01-24.80] | 25.07; [20.53-30.23] |
| Mähring                  | 18.32; [12.14-26.71]                   | 19.41; [12.74-28.44] | 23.46; [15.97-33.07] |
| Neusorg                  | 7.09; [3.81-12.81]                     | 8.16; [4.29-14.99]   | 12.42; [7.28-20.39]  |
| Pechbrunn                | 12.71; [6.87-22.33]                    | 15.98; [9.06-26.65]  | 21.89; [12.94-34.57] |
| Plößberg                 | 7.06; [4.27-11.46]                     | 7.80; [4.57-13.02]   | 13.13; [8.94-18.87]  |
| Pullenreuth              | 3.78; [1.50-9.21]                      | 4.25; [1.58-10.92]   | 9.43; [4.74-17.87]   |
| Reuth b.Erbendorf        | 22.62; [14.49-33.52]                   | 23.82; [15.06-35.55] | 32.83; [22.29-45.42] |
| Tirschenreuth            | 10.64; [8.32-13.51]                    | 11.86; [9.22-15.12]  | 18.47; [15.18-22.27] |
| Waldershof               | 3.80; [1.92-7.40]                      | 4.89; [2.54-9.21]    | 11.63; [7.57-17.46]  |
| Waldsassen               | 9.04; [6.47-12.48]                     | 10.14; [7.21-14.09]  | 15.91; [12.11-20.61] |
| Wiesau                   | 8.62; [5.64-12.97]                     | 9.79; [6.28-14.94]   | 16.14; [11.51-22.18] |
| <b>Senior care homes</b> |                                        |                      |                      |
| without senior care home | 8.71; [7.34-10.31]                     | 9.59; [8.04-11.41]   | 14.25; [12.32-16.42] |
| with senior care home    | 9.40; [8.37-10.54]                     | 10.22; [9.06-11.51]  | 16.05; [14.60-17.62] |

**Supplemental Table S6.**

**Standardized (N-based) period seroprevalence by municipality at Baseline (BL), at FU1 (period between BL and FU1) and FU2 (period between FU1 and FU2).** Shown are the population at risk in the general Tirschenreuth population and the analyzed cohort as absolute numbers and percentages of the according group. Further shown is standardized and corrected seroprevalence (based on N-antibodies) (%) in the indicated municipalities with the 95% Wilson confidence intervals (95%-CI). The CI is marked as [registered] for seroprevalence, when case prevalence exceeded seoprevalence, as SDR was then set to 1.0 and registered cases were used for all calculations.

| Subgroup          | Population at risk<br>Tirschenreuth<br>#; [%] |                  |                  | Population at risk<br>Cohort<br>#; [%] |                 |                 | new seropositive<br>%; [95%-CI] |                         |                          |
|-------------------|-----------------------------------------------|------------------|------------------|----------------------------------------|-----------------|-----------------|---------------------------------|-------------------------|--------------------------|
| Municipality      | BL                                            | FU1              | FU2              | BL                                     | FU1             | FU2             | BL                              | FU1                     | FU2                      |
| Bad Neualbenreuth | 1186;<br>[1.83]                               | 1095;<br>[1.87]  | 1095;<br>[1.88]  | 93;<br>[2.22]                          | 69;<br>[2.18]   | 66;<br>[2.33]   | 7.65;<br>[3.77 - 14.88]         | 0.37;<br>[registered]   | 6.61;<br>[2.70 - 15.30]  |
| Brand             | 1025;<br>[1.59]                               | 972;<br>[1.66]   | 972;<br>[1.67]   | 59;<br>[1.41]                          | 47;<br>[1.49]   | 45;<br>[1.59]   | 5.16;<br>[1.78 - 14.02]         | 0.21;<br>[registered]   | 9.14;<br>[3.66 - 21.05]  |
| Bärnau            | 2795;<br>[4.32]                               | 2529;<br>[4.31]  | 2453;<br>[4.21]  | 183;<br>[4.38]                         | 141;<br>[4.46]  | 123;<br>[4.35]  | 9.51;<br>[6.06 - 14.63]         | 3.03;<br>[1.22 - 7.33]  | 4.77;<br>[registered]    |
| Ebnath            | 1710;<br>[2.65]                               | 1603;<br>[2.73]  | 1570;<br>[2.69]  | 65;<br>[1.55]                          | 51;<br>[1.61]   | 49;<br>[1.73]   | 6.25;<br>[2.47 - 14.91]         | 2.09;<br>[0.39 - 10.50] | 3.31;<br>[registered]    |
| Erbendorf         | 4476;<br>[6.92]                               | 4108;<br>[7.00]  | 4108;<br>[7.05]  | 262;<br>[6.27]                         | 195;<br>[6.17]  | 175;<br>[6.19]  | 8.22;<br>[5.47 - 12.19]         | 0.54;<br>[registered]   | 4.78;<br>[2.48 - 9.03]   |
| Falkenberg        | 822;<br>[1.27]                                | 800;<br>[1.36]   | 786;<br>[1.35]   | 74;<br>[1.77]                          | 62;<br>[1.96]   | 55;<br>[1.94]   | 2.73;<br>[0.76 - 9.37]          | 1.71;<br>[0.32 - 8.74]  | 7.64;<br>[3.08 - 17.74]  |
| Friedenfels       | 1103;<br>[1.71]                               | 1037;<br>[1.77]  | 1036;<br>[1.78]  | 86;<br>[2.06]                          | 67;<br>[2.12]   | 63;<br>[2.23]   | 5.99;<br>[2.62 - 13.13]         | 0.19;<br>[registered]   | 5.12;<br>[registered]    |
| Fuchsmühl         | 1387;<br>[2.15]                               | 1184;<br>[2.02]  | 1184;<br>[2.03]  | 87;<br>[2.08]                          | 62;<br>[1.96]   | 53;<br>[1.87]   | 14.61;<br>[8.69 - 23.52]        | 0.42;<br>[registered]   | 5.75;<br>[1.99 - 15.49]  |
| Immenreuth        | 1600;<br>[2.48]                               | 1584;<br>[2.70]  | 1584;<br>[2.72]  | 100;<br>[2.39]                         | 83;<br>[2.62]   | 75;<br>[2.65]   | 1.00;<br>[0.18 - 5.45]          | 1.07;<br>[registered]   | 8.33;<br>[registered]    |
| Kastl             | 1208;<br>[1.87]                               | 1178;<br>[2.01]  | 1178;<br>[2.02]  | 83;<br>[1.99]                          | 70;<br>[2.21]   | 61;<br>[2.16]   | 2.52;<br>[0.71 - 8.52]          | 0.85;<br>[registered]   | 4.99;<br>[1.72 - 13.59]  |
| Kemnath           | 4773;<br>[7.38]                               | 4683;<br>[7.98]  | 4683;<br>[8.03]  | 291;<br>[6.96]                         | 251;<br>[7.94]  | 217;<br>[7.67]  | 1.88;<br>[0.83 - 4.17]          | 0.23;<br>[registered]   | 8.99;<br>[5.86 - 13.54]  |
| Konnernsreuth     | 1501;<br>[2.32]                               | 1310;<br>[2.23]  | 1310;<br>[2.25]  | 109;<br>[2.61]                         | 88;<br>[2.78]   | 80;<br>[2.83]   | 12.73;<br>[7.72 - 20.28]        | 1.07;<br>[registered]   | 5.30;<br>[2.14 - 12.57]  |
| Krummennaab       | 1299;<br>[2.01]                               | 1140;<br>[1.94]  | 1120;<br>[1.92]  | 84;<br>[2.01]                          | 62;<br>[1.96]   | 58;<br>[2.05]   | 12.26;<br>[6.86 - 20.96]        | 1.71;<br>[0.32 - 8.74]  | 3.49;<br>[0.97 - 11.79]  |
| Kulmain           | 1928;<br>[2.98]                               | 1827;<br>[3.11]  | 1827;<br>[3.13]  | 136;<br>[3.25]                         | 96;<br>[3.04]   | 82;<br>[2.9]    | 5.22;<br>[2.57 - 10.34]         | 1.04;<br>[registered]   | 5.09;<br>[registered]    |
| Leonberg          | 870;<br>[1.35]                                | 688;<br>[1.17]   | 688;<br>[1.18]   | 69;<br>[1.65]                          | 46;<br>[1.45]   | 39;<br>[1.38]   | 20.88;<br>[12.95 - 31.87]       | 0.87;<br>[registered]   | 15.95;<br>[7.62 - 30.38] |
| Mitterteich       | 5899;<br>[9.13]                               | 4777;<br>[8.14]  | 4716;<br>[8.09]  | 376;<br>[8.99]                         | 252;<br>[7.97]  | 223;<br>[7.89]  | 19.03;<br>[15.38 - 23.30]       | 1.26;<br>[0.44 - 3.54]  | 6.28;<br>[3.78 - 10.26]  |
| Mähring           | 1560;<br>[2.41]                               | 1274;<br>[2.17]  | 1274;<br>[2.19]  | 107;<br>[2.56]                         | 78;<br>[2.47]   | 72;<br>[2.55]   | 18.32;<br>[12.14 - 26.71]       | 1.33;<br>[registered]   | 5.02;<br>[registered]    |
| Neusorg           | 1810;<br>[2.8]                                | 1682;<br>[2.86]  | 1662;<br>[2.85]  | 131;<br>[3.13]                         | 96;<br>[3.04]   | 81;<br>[2.86]   | 7.09;<br>[3.81 - 12.81]         | 1.16;<br>[0.22 - 5.85]  | 4.63;<br>[registered]    |
| Pechbrunn         | 1173;<br>[1.81]                               | 1024;<br>[1.74]  | 986;<br>[1.69]   | 72;<br>[1.72]                          | 57;<br>[1.8]    | 44;<br>[1.56]   | 12.71;<br>[6.87 - 22.33]        | 3.75;<br>[1.07 - 12.26] | 7.03;<br>[2.46 - 18.50]  |
| Plößberg          | 2835;<br>[4.39]                               | 2635;<br>[4.49]  | 2616;<br>[4.49]  | 202;<br>[4.83]                         | 149;<br>[4.71]  | 138;<br>[4.88]  | 7.06;<br>[4.27 - 11.46]         | 0.80;<br>[registered]   | 5.77;<br>[registered]    |
| Pullenreuth       | 1500;<br>[2.32]                               | 1443;<br>[2.46]  | 1443;<br>[2.48]  | 109;<br>[2.61]                         | 80;<br>[2.53]   | 71;<br>[2.51]   | 3.78;<br>[1.50 - 9.21]          | 0.49;<br>[registered]   | 5.40;<br>[registered]    |
| Reuth             | 994;<br>[1.54]                                | 769;<br>[1.31]   | 768;<br>[1.32]   | 72;<br>[1.72]                          | 49;<br>[1.55]   | 44;<br>[1.56]   | 22.62;<br>[14.49 - 33.52]       | 1.56;<br>[registered]   | 11.82;<br>[5.24 - 24.53] |
| b.Erbendorf       |                                               |                  |                  |                                        |                 |                 |                                 |                         |                          |
| Tirschenreuth     | 7807;<br>[12.08]                              | 6976;<br>[11.88] | 6881;<br>[11.81] | 545;<br>[13.04]                        | 409;<br>[12.93] | 374;<br>[13.22] | 10.64;<br>[8.32 - 13.51]        | 1.36;<br>[0.61 - 3.02]  | 7.50;<br>[registered]    |

|                   |                 |                 |                 |                |                |                |                         |                        |                         |
|-------------------|-----------------|-----------------|-----------------|----------------|----------------|----------------|-------------------------|------------------------|-------------------------|
| <b>Waldershof</b> | 3869;<br>[5.99] | 3722;<br>[6.34] | 3720;<br>[6.38] | 203;<br>[4.86] | 165;<br>[5.22] | 146;<br>[5.16] | 3.80;<br>[1.92 - 7.40]  | 1.13;<br>[registered]  | 7.09;<br>[3.94 - 12.45] |
| <b>Waldsassen</b> | 5862;<br>[9.07] | 5332;<br>[9.08] | 5332;<br>[9.15] | 354;<br>[8.47] | 271;<br>[8.57] | 244;<br>[8.63] | 9.04;<br>[6.47 - 12.48] | 1.22;<br>[registered]  | 6.41;<br>[3.96 - 10.21] |
| <b>Wiesau</b>     | 3651;<br>[5.65] | 3336;<br>[5.68] | 3294;<br>[5.65] | 229;<br>[5.48] | 166;<br>[5.25] | 150;<br>[5.30] | 8.62;<br>[5.64 - 12.97] | 1.27;<br>[0.36 - 4.39] | 7.05;<br>[3.93 - 12.30] |

**Supplemental Table S7** Sensitivity analysis of our SDR estimates for Baseline (BL) Follow up 1 (FU1) and Follow up 2 (FU2), calculated with an assumed (lower bound) specificity of 99.5% for PCR testing and thus registered cases at health authorities. Missing a better estimate, the total number of tests in the county was derived from the fraction tested within our cohort and standardized to the whole population.

| SURVEILLANCE DETECTION RATIO-SENSITIVITY ANALYSIS |                           |                           |                           |
|---------------------------------------------------|---------------------------|---------------------------|---------------------------|
| SUBGROUP                                          | BL                        | FU1                       | FU2                       |
|                                                   | sens,<br>[prev; % change] | sens,<br>[prev; % change] | sens,<br>[prev; % change] |
| <b>OVERALL</b>                                    | 5.51,<br>[5.35, 3.07]     | 0.99,<br>[0.82, 20.42]    | 1.19,<br>[1.14, 4.17]     |
| <b>M</b>                                          | 6.49,<br>[6.3, 3.11]      | 1.00,<br>[0.83, 20.66]    | 1.22,<br>[1.17, 4.17]     |
| <b>W</b>                                          | 4.81,<br>[4.67, 3.04]     | 0.98,<br>[0.81, 20.75]    | 1.16,<br>[1.11, 4.16]     |
| <b>14 TO 19</b>                                   | 11.79,<br>[11.47, 2.78]   | 1.76,<br>[1.44, 22.22]    | 2.58,<br>[2.48, 4.3]      |
| <b>20 TO 29</b>                                   | 7.6,<br>[7.37, 3.13]      | 0.79,<br>[0.65, 20.25]    | 1.5,<br>[1.44, 4.14]      |
| <b>30 TO 39</b>                                   | 5.72,<br>[5.55, 3.06]     | N/A,<br>[N/A, 0]          | 1.18,<br>[1.14, 4.15]     |
| <b>40 TO 49</b>                                   | 5.78,<br>[5.6, 3.31]      | 1.55,<br>[1.29, 20.69]    | 0.91,<br>[0.88, 4.21]     |
| <b>50 TO 59</b>                                   | 6.2,<br>[6.02, 2.88]      | 0.99,<br>[0.82, 20]       | 1.41,<br>[1.36, 4.1]      |
| <b>60 TO 69</b>                                   | 6.52,<br>[6.34, 2.96]     | 0.55,<br>[0.46, 20]       | 0.99,<br>[0.95, 4.26]     |
| <b>70 TO 79</b>                                   | 3.89,<br>[3.78, 2.84]     | 1.55,<br>[1.28, 20.83]    | 0.83,<br>[0.79, 4.13]     |
| <b>AT LEAST<br/>80</b>                            | 2.97,<br>[2.88, 3.32]     | 1.56,<br>[1.27, 22.22]    | 0.37,<br>[0.35, 4.14]     |



**Supplemental Table S8 (Supplement to figure 3).**

**Standardized (N-based) Seroprevalence, SDR and IFR in municipalities with and w/o SCH at Baseline (BL), at FU1 (period between BL and FU1) and FU2 (period between FU1 and FU2).** Shown are the population at risk in the general Tirschenreuth population and the analyzed cohort as absolute numbers and percentages of the according group. Further shown is standardized and corrected seroprevalence (based on N-antibodies) (%) in the indicated municipalities with the 95% Wilson confidence intervals (95%-CI) as well as SDR and IFR with 95% Bayesian credibility intervals. The CI is marked as [reg.] for seroprevalence and SDR, when case prevalence exceeded seoprevalence, as SDR was then set to 1.0 and registered cases were used for all calculations.

| Subgroup                       | Population at risk<br>Tirschenreuth<br>#; [%] |                   |                   | Population at risk<br>Cohort<br>#; [%] |                  |                  | new seropositive<br>%; [95%-CI] |                 |                | SDR<br>#; [95%-CI] |                 |                | IFR<br>%; [95%-CI] |                |                |
|--------------------------------|-----------------------------------------------|-------------------|-------------------|----------------------------------------|------------------|------------------|---------------------------------|-----------------|----------------|--------------------|-----------------|----------------|--------------------|----------------|----------------|
|                                | BL                                            | FU1               | FU2               | BL                                     | FU1              | FU2              | BL                              | FU1             | FU2            | BL                 | FU1             | FU2            | BL                 | FU1            | FU2            |
| without<br>senior care<br>home | 20773;<br>[32.13]                             | 18964;<br>[32.30] | 18780;<br>[32.22] | 1392;<br>[33.29]                       | 1058;<br>[33.46] | 947;<br>[33.49]  | 8.71;<br>[7.34                  | 0.97;<br>[0.53  | 5.15;<br>[3.91 | 8.10;<br>[6.53     | 1.18;<br>[1.00  | 1.02;<br>[1.00 | 0.72;<br>[0.41     | 1.09;<br>[0.29 | 2.90;<br>[1.84 |
|                                |                                               |                   |                   |                                        |                  |                  | –<br>10.31]                     | –<br>1.76]      | –<br>6.74]     | –<br>10.03]        | –<br>2.19]      | –<br>1.34]     | –<br>1.27]         | –<br>4.53]     | –<br>4.59]     |
| with<br>senior care<br>home    | 43870;<br>[67.87]                             | 39746;<br>[67.70] | 39508;<br>[67.78] | 2789;<br>[66.71]                       | 2104;<br>[66.54] | 1881;<br>[66.51] | 9.40;<br>[8.37                  | 0.90;<br>[reg.] | 6.50;<br>[5.47 | 4.66;<br>[4.08     | 1.00;<br>[reg.] | 1.19;<br>[1.00 | 3.03;<br>[2.46     | 2.23;<br>[1.00 | 3.43;<br>[2.63 |
|                                |                                               |                   |                   |                                        |                  |                  | –<br>10.54]                     | –<br>[reg.]     | –<br>7.70]     | –<br>5.32]         | –<br>[reg.]     | –<br>1.42]     | –<br>3.74]         | –<br>5.02]     | –<br>4.49]     |

**Supplemental Table S9 (Supplement to figure 4)**

**Standardized (S-based) period seroprevalence at Baseline (BL), at FU1 (period between BL and FU1) and FU2 (period between FU1 and FU2).** Shown are the population at risk in the general Tirschenreuth population and the analyzed cohort as absolute numbers as well as absolute numbers off all S-antibody positive, S&N positive and only S positive participants. Further shown is standardized and corrected seroprevalence (based on S-antibodies) (%) in the indicated groups with the 95% Wilson confidence intervals (95%-CI).

| <b>Subgroup</b>          | <b>population<br/>at risk<br/># County<br/>[# Cohort]</b> | <b>S-antibody<br/>positive<br/># total<br/>[# S&amp;N, # only S]</b> | <b>Standardized<br/>total S positive<br/>% [CI]</b> | <b>Standardized<br/>S&amp;N positive<br/>% [CI]</b> | <b>Standardized<br/>only S positive<br/>% [CI]</b> |
|--------------------------|-----------------------------------------------------------|----------------------------------------------------------------------|-----------------------------------------------------|-----------------------------------------------------|----------------------------------------------------|
| <b>overall</b>           | 64379<br>[3371]                                           | 1503<br>[515, 988]                                                   | 45.79<br>[44.11-47.47]                              | 15.06<br>[13.89-16.31]                              | 30.53<br>[29.00-32.10]                             |
| <b>sex</b>               |                                                           |                                                                      |                                                     |                                                     |                                                    |
| m                        | 32102<br>[1559]                                           | 674<br>[242, 432]                                                    | 44.48<br>[42.03-46.96]                              | 15.29<br>[13.59-17.16]                              | 28.96<br>[26.76-31.26]                             |
| w                        | 32277<br>[1812]                                           | 829<br>[273, 556]                                                    | 47.08<br>[44.79-49.39]                              | 14.83<br>[13.27-16.54]                              | 32.09<br>[29.98-34.28]                             |
| <b>age<br/>group</b>     |                                                           |                                                                      |                                                     |                                                     |                                                    |
| 14 to 19                 | 3994<br>[177]                                             | 51<br>[44, 7]                                                        | 28.77<br>[22.60-35.83]                              | 24.50<br>[18.75-31.33]                              | 3.80<br>[1.83-7.73]                                |
| 20 to 29                 | 8145<br>[374]                                             | 129<br>[68, 61]                                                      | 34.47<br>[29.84-39.43]                              | 17.87<br>[14.32-22.07]                              | 16.29<br>[12.90-20.38]                             |
| 30 to 39                 | 8430<br>[420]                                             | 135<br>[53, 82]                                                      | 32.11<br>[27.83-36.72]                              | 12.34<br>[9.53-15.83]                               | 19.54<br>[16.03-23.60]                             |
| 40 to 49                 | 8781<br>[488]                                             | 210<br>[81, 129]                                                     | 43.06<br>[38.74-47.49]                              | 16.29<br>[13.28-19.83]                              | 26.53<br>[22.81-30.62]                             |
| 50 to 59                 | 12802<br>[737]                                            | 296<br>[132, 164]                                                    | 40.18<br>[36.70-43.76]                              | 17.60<br>[15.02-20.51]                              | 22.30<br>[19.45-25.45]                             |
| 60 to 69                 | 10389<br>[652]                                            | 263<br>[78, 185]                                                     | 40.35<br>[36.65-44.16]                              | 11.69<br>[9.44-14.38]                               | 28.49<br>[25.16-32.08]                             |
| 70 to 79                 | 6712<br>[360]                                             | 274<br>[39, 235]                                                     | 76.32<br>[71.66-80.41]                              | 10.57<br>[7.80-14.17]                               | 65.82<br>[60.77-70.53]                             |
| over 80                  | 5126<br>[163]                                             | 145<br>[20, 125]                                                     | 89.23<br>[83.54-93.12]                              | 11.99<br>[7.86-17.87]                               | 77.35<br>[70.34-83.11]                             |
| <b>senior care homes</b> |                                                           |                                                                      |                                                     |                                                     |                                                    |
| without<br>SCH           | 20730<br>[1114]                                           | 459<br>[155, 304]                                                    | 42.25<br>[39.39-45.18]                              | 13.49<br>[11.61-15.62]                              | 28.58<br>[26.00-31.30]                             |
| with SCH                 | 43649<br>[2257]                                           | 1044<br>[360, 684]                                                   | 47.46<br>[45.41-49.53]                              | 15.81<br>[14.36-17.37]                              | 31.45<br>[29.57-33.40]                             |
